# Supplementary material for: Evolution of MIR168 paralogs in Brassicaceae
Source: PubMed Central journal article supplement (PMC2664809; doi:10.1186/1471-2148-9-62), 2009-03-23
Supplement: 1471-2148-9-62-S1.pdf [file 1471-2148-9-62-S1.pdf]

## MICROSYNTENIC PHYLOGENETIC FOOTPRINTING OF *MIR168* LOCI IN BRASSICACEAE

Silvia Gazzani, Mingai Li, Silvia Maistri, Eliana Scarponi, Michele Graziola, Enrico Barbaro, Jörg Wunder, Antonella Furini, Heinz Saedler and Claudio Varotto

### Additional File 1

Arabidopsis and poplar BLASTP RBM pairs and homologous gene pairs present in the *MIR168* syntenic regions and corresponding to gray and black lines in Figure 1A, respectively.

| Ath accession number | Location | Start    | End      | Strand | Poplar accession number                             | Location    | Start    | End      | Strand | RBM |
|----------------------|----------|----------|----------|--------|-----------------------------------------------------|-------------|----------|----------|--------|-----|
| AT4G19340.1          | Chr4     | 10559621 | 10560895 | +      | gjil Poptr1_1 783288 fgenes4_pg.C_scaffold_86000148 | scaffold_86 | 1233580  | 1236489  | -      | no  |
| AT4G19350.1          | Chr4     | 10562034 | 10563768 | -      | gjil Poptr1_1 297492 gw1.86.383.1                   | scaffold_86 | 1247120  | 1250215  | +      | yes |
| AT4G19360.1          | Chr4     | 10564170 | 10565417 | +      | gjil Poptr1_1 783288 fgenes4_pg.C_scaffold_86000148 | scaffold_86 | 1233580  | 1236489  | -      | no  |
| AT4G19370.1          | Chr4     | 10566161 | 10567849 | -      | gjil Poptr1_1 827495 estExt_fgenes4_pg.C_860147     | scaffold_86 | 1231066  | 1232602  | +      | no  |
| AT4G19380.1          | Chr4     | 10568376 | 10572423 | -      | gjil Poptr1_1 810654 fgenes4_pm.C_scaffold_86000052 | scaffold_86 | 1226473  | 1229825  | +      | yes |
| AT4G19390.1          | Chr4     | 10574779 | 10576439 | -      | gjil Poptr1_1 297476 gw1.86.367.1                   | scaffold_86 | 1188370  | 1189987  | +      | yes |
| AT4G19400.1          | Chr4     | 10580838 | 10582000 | -      | gjil Poptr1_1 817261 estExt_fgenes4_pg.C_LG_III0842 | LG_III      | 10319963 | 10322147 | -      | yes |
| AT4G19410.1          | Chr4     | 10582032 | 10585769 | -      | gjil Poptr1_1 827491 estExt_fgenes4_pg.C_860138     | scaffold_86 | 1136355  | 1139435  | -      | no  |
| AT4G19410.1          | Chr4     | 10582032 | 10585769 | -      | gjil Poptr1_1 827492 estExt_fgenes4_pg.C_860139     | scaffold_86 | 1148267  | 1152458  | -      | no  |
| AT4G19410.1          | Chr4     | 10582032 | 10585769 | -      | gjil Poptr1_1 553558 eugene3.00030191               | LG_III      | 2724212  | 2727104  | +      | yes |
| AT4G19420.1          | Chr4     | 10587177 | 10590561 | -      | gjil Poptr1_1 827492 estExt_fgenes4_pg.C_860139     | scaffold_86 | 1148267  | 1152458  | -      | yes |
| AT4G19420.1          | Chr4     | 10587177 | 10590561 | -      | gjil Poptr1_1 827491 estExt_fgenes4_pg.C_860138     | scaffold_86 | 1136355  | 1139435  | -      | no  |
| AT4G19420.1          | Chr4     | 10587177 | 10590561 | -      | gjil Poptr1_1 553558 eugene3.00030191               | LG_III      | 2724212  | 2727104  | +      | no  |
| AT4G19430.1          | Chr4     | 10598456 | 10599162 | -      | gjil Poptr1_1 817257 estExt_fgenes4_pg.C_LG_III0833 | LG_III      | 10245085 | 10245602 | +      | yes |
| AT4G19440.1          | Chr4     | 10600801 | 10604531 | -      | gjil Poptr1_1 414018 gw1.III.1121.1                 | LG_III      | 10237663 | 10239939 | +      | yes |
| AT4G19450.1          | Chr4     | 10606464 | 10609346 | +      | gjil Poptr1_1 799838 fgenes4_pm.C_LG_III000303      | LG_III      | 10225315 | 10231352 | -      | yes |
| AT4G19460.1          | Chr4     | 10610320 | 10612016 | -      | gjil Poptr1_1 554146 eugene3.00030779               | LG_III      | 10223425 | 10224894 | +      | yes |
| AT5G45275.1          | Chr5     | 18351632 | 18354607 | -      | gjil Poptr1_1 799838 fgenes4_pm.C_LG_III000303      | LG_III      | 10225315 | 10231352 | -      | no  |
| AT5G45280.1          | Chr5     | 18362822 | 18366922 | +      | gjil Poptr1_1 827492 estExt_fgenes4_pg.C_860139     | scaffold_86 | 1148267  | 1152458  | -      | no  |
| AT5G45280.1          | Chr5     | 18362822 | 18366922 | +      | gjil Poptr1_1 827491 estExt_fgenes4_pg.C_860138     | scaffold_86 | 1136355  | 1139435  | -      | yes |
| AT5G45280.1          | Chr5     | 18362822 | 18366922 | +      | gjil Poptr1_1 553558 eugene3.00030191               | LG_III      | 2724212  | 2727104  | +      | no  |
| AT5G45290.1          | Chr5     | 18367009 | 18369725 | -      | gjil Poptr1_1 817260 estExt_fgenes4_pg.C_LG_III0841 | LG_III      | 10309691 | 10314860 | -      | yes |
| AT5G45300.1          | Chr5     | 18370835 | 18374102 | +      | gjil Poptr1_1 414016 gw1.III.1119.1                 | LG_III      | 10302181 | 10308051 | -      | yes |
| AT5G45310.1          | Chr5     | 18376502 | 18378341 | -      | gjil Poptr1_1 297474 gw1.86.365.1                   | scaffold_86 | 1175722  | 1178140  | -      | yes |
| AT5G45320.1          | Chr5     | 18379338 | 18380395 | -      | gjil Poptr1_1 810653 fgenes4_pm.C_scaffold_86000051 | scaffold_86 | 1184973  | 1185494  | -      | no  |
| AT5G45320.1          | Chr5     | 18379338 | 18380395 | -      | gjil Poptr1_1 414318 gw1.III.1421.1                 | LG_III      | 2694005  | 2694556  | +      | yes |
| AT5G45330.1          | Chr5     | 18380633 | 18383897 | -      | gjil Poptr1_1 783288 fgenes4_pg.C_scaffold_86000148 | scaffold_86 | 1233580  | 1236489  | -      | yes |
| AT5G45340.1          | Chr5     | 18385869 | 18388218 | -      | gjil Poptr1_1 783291 fgenes4_pg.C_scaffold_86000151 | scaffold_86 | 1254410  | 1256451  | -      | no  |
| AT5G45360.1          | Chr5     | 18401748 | 18404012 | -      | gjil Poptr1_1 827502 estExt_fgenes4_pg.C_860159     | scaffold_86 | 1326050  | 1329566  | -      | yes |
| AT5G45370.1          | Chr5     | 18405518 | 18407647 | +      | gjil Poptr1_1 836846 estExt_fgenes4_pm.C_860060     | scaffold_86 | 1418977  | 1421720  | -      | no  |
| AT5G45380.1          | Chr5     | 18408351 | 18413121 | +      | gjil Poptr1_1 415505 gw1.III.2608.1                 | LG_III      | 10131890 | 10134134 | +      | yes |
| AT5G45390.1          | Chr5     | 18413529 | 18415343 | +      | gjil Poptr1_1 554124 eugene3.00030757               | LG_III      | 10096309 | 10099359 | -      | yes |
| AT5G45400.1          | Chr5     | 18416217 | 18418871 | +      | gjil Poptr1_1 646356 grail3.0018008701              | LG_III      | 10062020 | 10064330 | -      | yes |
