# Supplementary material for: Evolution of MIR168 paralogs in Brassicaceae
Source: PubMed Central journal article supplement (PMC2664809; doi:10.1186/1471-2148-9-62), 2009-03-23
Supplement: 1471-2148-9-62-S2.pdf [file 1471-2148-9-62-S2.pdf]

B)

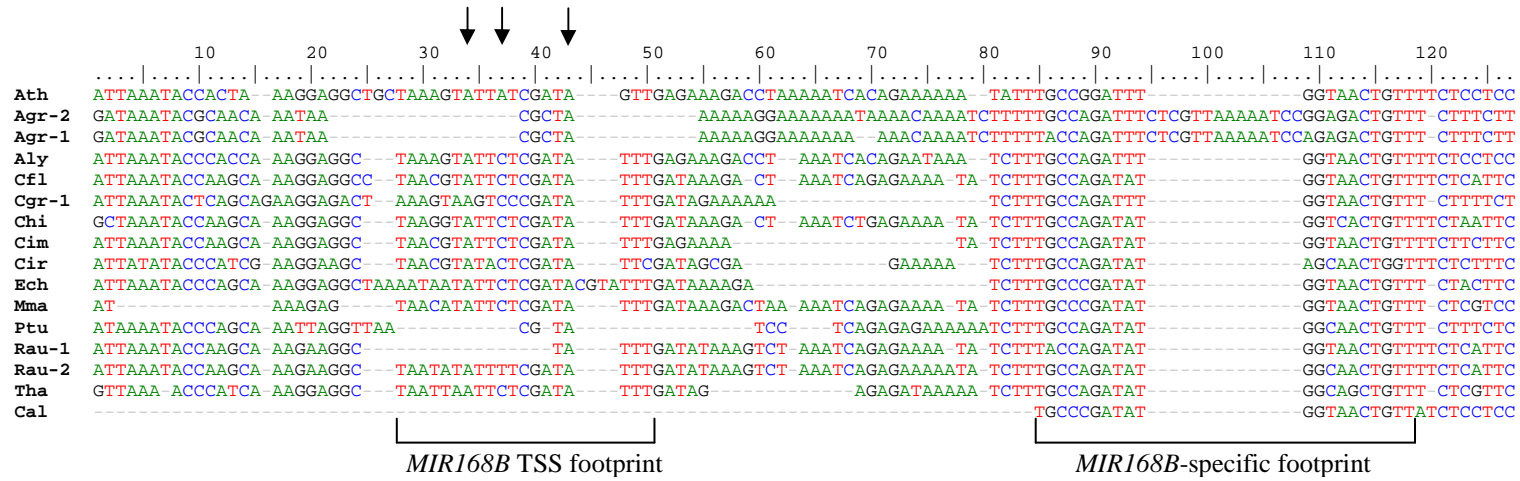

C)

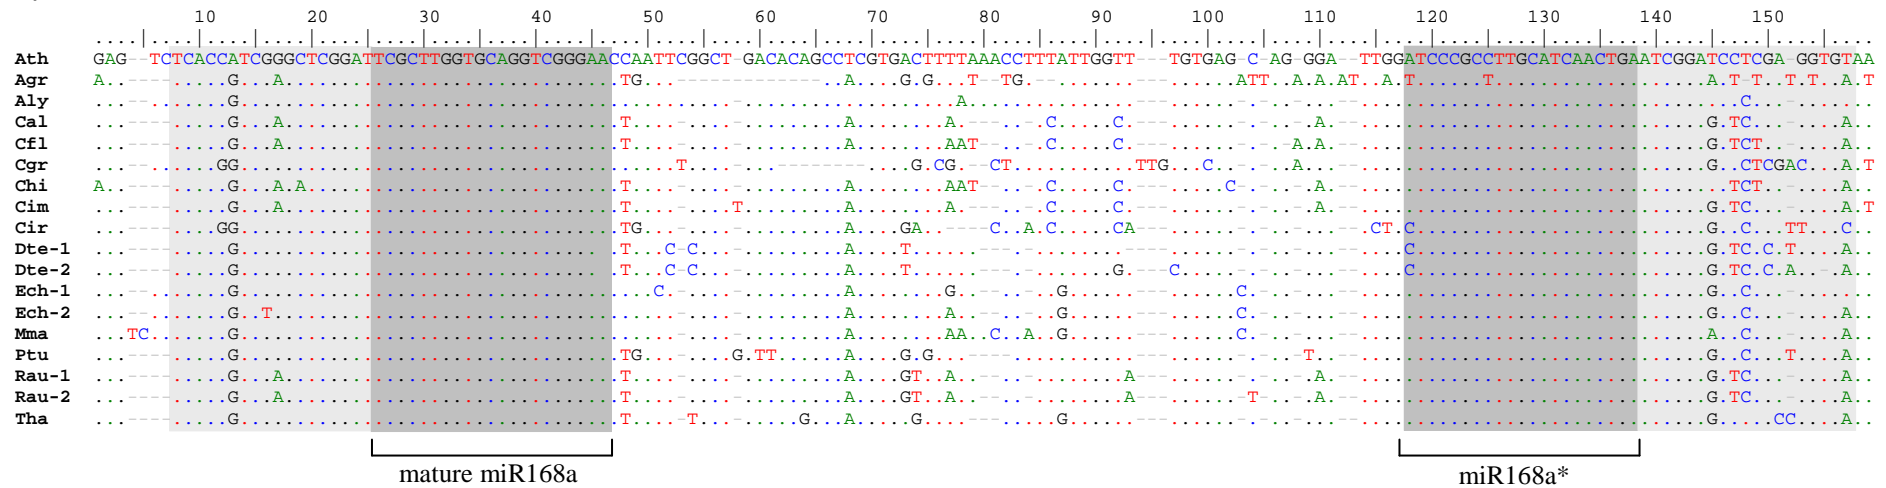

D)

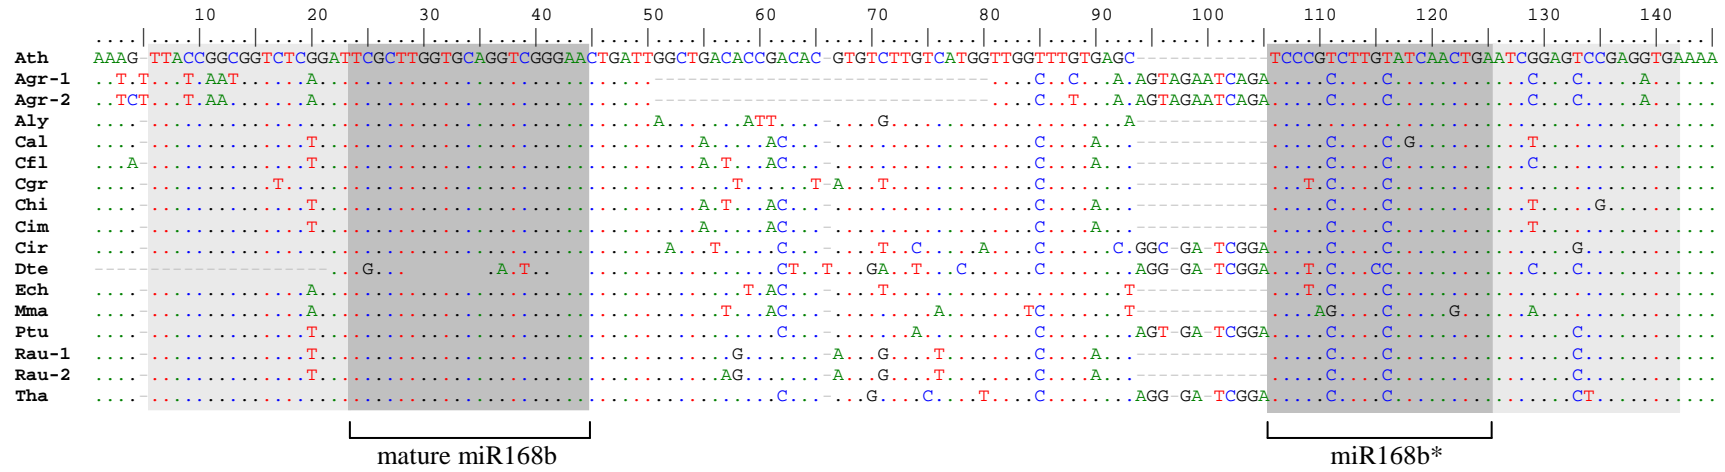

E)

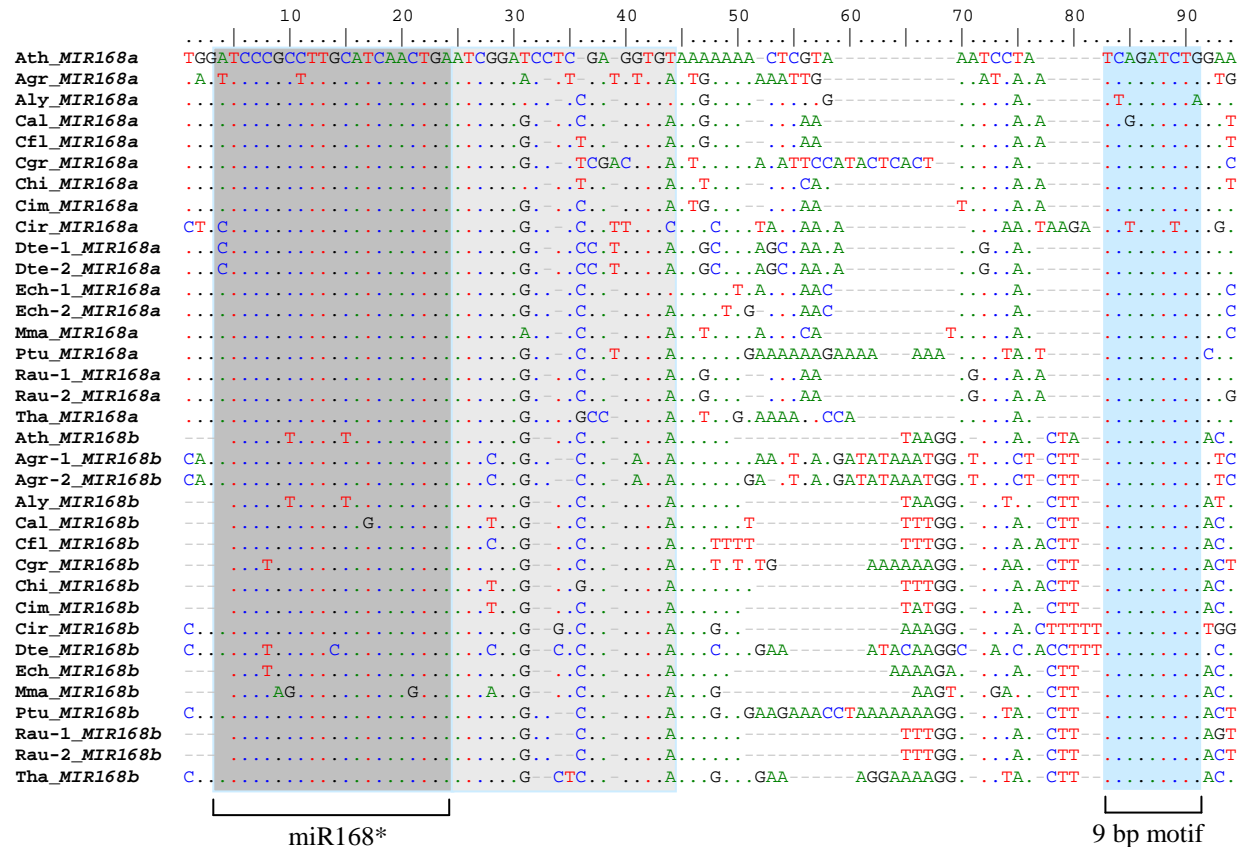

F)

>Ath\_MIR168a

GATAGGGTTCCT-----TCTTCTTCTTATTA-CAT-----ATC--ATAAACCTCATT--CCCCATTAC-AAAACCTAGA-----ACTCCTTCTCTTCTTCTTTCTTCATA-----TCCCTG-----TCT-----  
-----AAAGGGATT-----ATT-ATGATAGT--AGAG--TCTCACCATCGGGCTCGGATTCGCTTGGTGCAGGTTCGGGAACCAATTCGGC-TGA-CACAGCCTCGTACTTTTAAACCTTTATTGGTT--TGTGAGC--  
AG-GGA--TTGGATCCCGCCTTGCATCAACTGAATCGGATCCTCGA-GGTGTA--AAAA-----ACTCGTAAATCCTA-TCAGATCTG----GAAGATT-----TCT--ACGC--T-----T-CTCC-TTCTTT-  
ATAT

>Agr-1\_MIR168a

GATAGACCAATCT-----TTACCATATTTT-CACCATT----AACACTC-T-----AC-AAAACCTAAA---ACTCTTC-TCTCTCTCCTC-TTTTTTCACTTTCTCTC-----TACA-----  
TAGAGAGA-----TTGAT----AAAG---TCACCGTCGAGCTCGGATTCGCTTGGTGCAGGTTCGGGAACCTGATT-----CCACGTGGCGTTTT--TGTATTGGTT--  
TGTGAGATTAGAGAAATTTAGTTCCCGCTTTCATCAACTGAATCGGAAC-TTGTGTTGAATGAAAAA-----TTGAAATCAAA-TCAGATCTGGT--GGAGATA-----TCT-----  
TACTC-TCTCTTT-CTTT

>Aly\_MIR168a

GATAGGGTTCCTC-----CTTATTACATC---ATAAACCTATT--CTC-TGCCTCATT--CCCCATTAC-AAAACCTAAA-----TCTCCTTCTCTTCTCTCTT-----CT-----TCT-----  
AAAGAGAGAGAGAGAGAG-----ATT-ATGATAT--AAGAG--TCTCACCCTCGGGCTCGGATTCGCTTGGTGCAGGTTCGGGAACCAATTCGGC-TGA-CACAGCCTCGTACTTTAAACCTTTATTGGTT--  
TGTGAGC--AG-GGA--TTGGATCCCGCCTTGCATCAACTGAATCGGATCCCCGA-GGTGTA--GAAA-----ACTCGTGAATCCAA-TTAGATCTA----GAAGAAA-----TCT--ACTC--T-----T-  
CTCC-TTCTTT-ATCT

>Cal\_MIR168a

GATAGG-----TTTTATTA-CATC---ACAAACCTTTCTTTTGCCTCATTTCACCACCATTAC-TACAGCTTCA-----TCTCTTATCTTTCTTCTCACAAGCCTTCG-----  
TTTCAGTTTCTTGAGAGCGGAGGAGAGATTACG--ATAGATGAT----AGAG---TCACCGTCGAGCTCGGATTCGCTTGGTGCAGGTTCGGGAACCAATTCGGC-TGA-CACAGCCACGTACTTAT--  
CCTCATTTGGCT--TGTGAGC--AG-GAA--TTGGATCCCGCCTTGCATCAACTGAATCGGAGCTCCGA-GGTGAA----AGAA-----ACTCAAAATCCAAA-TCGGATCTG-----GATGATT-----  
TAGAAGAAATCT--TCTC--T-----T-TTCT-TTCTTT-TTA

>Cfl\_MIR168a

GATAGGGTTCCT-----A-CATC--ACACAACCTTTCTTTTGCCTCATT--CACCATTTC-AACAACCTCT-----CTCTTCTCTTATCTTTTCTTCTCACAAGTCTTCG-----  
TTTCAGTTTCTTGAGAGCA-AGAAAGA-TTACG---TTAGATGAT----AGAG---TCACCGTCGAGCTCGGATTCGCTTGGTGCAGGTTCGGGAACCAATTCGGC-TGA-CACAGCCACGTACTTAAAT--  
CCTCATTTGGCT--TGTGAGC--A-AGAA--TTGGATCCCGCCTTGCATCAACTGAATCGGAGCTCTGA-GGTGAA----AGAA-----ACTCAAAATCCAAA-TCAGATCTG-----GATGATT-----TTT-----  
-----

>Cgr\_MIR168a

GATAGGGTTCCTTCTTCTTCTTCTTCTTCTTCA-CATCAATAAAAAACCATT--CTTTGCCTCGTT--CTCCATCACTAAAAACCTAAA----GGGAGACTCCTTCTCCTCCTTATCTCTC-----TCTCTG-----  
-----TCT-----AGAGAGA-TTCTT--ATATATAAACAGCGAGAG--TCTCACGGTCGGGCTCGGATTCGCTTGGTGCAGGTTCGGGAACCAATTTGGC-TGA-----CGTGAGTCGTCT--  
CTTTATTGGTTTTGTGTCAGC--AGAGGA--TTGGATCCCGCCTTGCATCAACTGAATCGGAGCCCTCGACGTGAAT---AAAAAACATTCCATACTCACTAATCCAA-TCAGATCTG----GACC-----  
TAT--ACTCGTT-----T-CTCC-TTCTTT-TTA-

>Chi\_MIR168a

GATAGGGTTCCT-----TA-CATCA-CAAAAACCATT-CTTTGCCTCATT--CACCATTAC-AACACCT-----TCCTTCTCTTATCTT-----TCTTCG-----  
TTTCAGTTTCTTGAGAGCAATAAAAAGATTTAC--GATAGATGAT----AAAG---TCACCGTCGAGATCGGATTCGCTTGGTGCAGGTTCGGGAACCAATTCGGC-TGA-CACAGCCACGTACTTAAAT--  
CCTCATTTGGCT--TGTGACC--AG-GAA--TTGGATCCCGCCTTGCATCAACTGAATCGGATCTCTGA-GGTGAAA----TAAA-----CTCAAAATCCAAA-TCAGATCTG-----GATGGTT-----  
TTTGAAGAAATCTGAAATC--T-----T-CTCC-TTCTTT-TTAT

>Cim\_MIR168a

GATAGGGTTCCT-----A-CATCA---CAACCATT-CTTTTGCCTCATT--CACCATTAC-AAAACCT-----TCTCTTCTTATCTCTTCTTCTC-ACAAGTCTTCG-----  
TTTCAGTTTCTTGAGAGCA-AGAAAGA-TTACC---ATAGATGAT----AGAG---TCACCGTCGAGCTCGGATTCGCTTGGTGCAGGTTCGGGAACCAATTCGGC-TGA-CACAGCCACGTACTTAT--  
CCTCATTTGGCT--TGTGAGC--AG-GAA--TTGGATCCCGCCTTGCATCAACTGAATCGGAGCTCCGA-GGTGAA----TGAA-----ACTCAATATCCAAA-TCAGATCTG----GAAGATT-----  
TAGAAGAAATCT--ACTC--T-----T-CTCC-TTCTTT-CTAT

>Cir\_MIR168a

CATAGGGTTCCT-----A-ATTC---ACAAA-CACT--CTTTGCCTCCTTT--CGCCATCCC-AAA-CCTAAA-----  
CTTCTCTCTCTCTTCTTCTTCTCTCTGTTCTGTCTTCTGTTCTATTTTGTTCCTCAGATTTCT-----AGAGAGAGA-TTG-----TGTGAT----AGAG----  
TCACGGTTCGGCTCGGATTCGCTTGGTGCAGGTTCGGGAACCTGATT-GGC-TGA-CACAGCCACGTGGATT---CCCATATTGGCA---TGTGAGC--AG-GGA--  
TCTGCTCCCGCCTTGCATCAACTGAATCGGAGCCCGATTGTGCAAA---CAAA-----TATCAAAAATCAAA-TAAGATCTGATTTGGGAGATA-----TAT--ACTC--T-----CCT-CTCC-TATTTC-ATTT

>Dte-2\_MIR168a

GATAGGGTTCCT-----AAAAACCAGAAACTAT-----TTAC-AAAACCTAAA-----ACTTATCTTTCTTCTCTCTCTTTA-----TTTTTT-----CTTTTATGGCTTTCAGATTCC-----  
-----AGAGAC-----TATGGT-----AGAG---TCACCGTCGGGCTCGGATTCGCTTGGTGCAGGTTCGGGA-CTAATC-CGC-TGA-CACAGCCACGTGCTTTT---ACTTATTGGTT---GTGAGC--AG-GGA--  
TTGGCTCCCGCCTTGCATCAACTGAATCGGAGCTCCCATGGTGAAGC--AAAA-----GCCAAAAAGCCAA-TCAGATCTG----GAAAAATATATCTTTGTGTGTGTCT--ATGT--TGATGCATAT-CTTC-  
TTCTGT-ATAT



TTACCGGCGGTCTCTGATTCGCTTGGTGCAGGTCGGGAACTGATTGGCTAATACCACCAC-GTGTCTTGTCATGGTTGGCTTGTAAGC-----  
TCCCGCCTGCATCAACTGAATCCGAGTCCGAGGTGAAAATTTTTTT-----GGATCCAAAC---TTTCAGATC--TGACACTTCTTCGTT-ACTCTT-----AAGGTAAATTTTGAT-----  
ATTTTGTTT---AT  
>Cgr-1\_MIR168b  
ATTAAATACTCAGCAGAAGGAGACT--AAAGTAAGTCCCGATA---TTTGATAGAAAAA-----TCTTTGCCAGATT-----GGTAACTGTTTCTTTCTCTTCTTTTCATCTTTTTTTTTTC-  
TTTCTAATGAGAAAAGAGAGAAAAGAGAGA-----TACGATGAA--GGTTACAAAAAAAAG-TTACCGGCGGTTTCGGATTTCGCTTGGTGCAGGTCGGGAACTGATTGGCTGACTCCGACAT-  
ATGTTTTGTCATGGTTGGCTTGTGAGC-----TCCTGCCTTGCATCAACTGAATCGGAGTCCGAGGTGAAAAATATAGAAAAA-----GGATCA-AAC---TTTCAGATC--TGACTCGATCTT----CATCTT--  
-----ACGGTAGAATCTTTAT-----ATTTTTTGTGAAA  
>Chi\_MIR168b  
GCTAAATACCAAGCA-AAGGAGGC--TAAGGTATTCTCGATA---TTTGATAAAGA-CT--AAATCTGAGAAAA-TA-TCTTTGCCAGATAT-----GGTCACTGTTTTCTAATTCTTCT-----  
CCTCTTTCATATT-TTCCATTGAGAGAGATAGAGCAAAAAG-----TACGATGAT--GATA-----AAG-  
TTACCGGCGGTCTCTGATTCGCTTGGTGCAGGTCGGGAACTGATTGGCTAATACCACCAC-GTGTCTTGTCATGGTTGGCTTGTAAGC-----  
TCCCGCCTGCATCAACTGAATCTGAGTCGGAGGTGAAAAAAATTT-----GGATCCAAAC---TTTCAGATC--TGACACGTTCTTCGTTCACTCTT-----AAGGTAAATATTGAT-----  
ATTTGGTTT---AT  
>Cim\_MIR168b  
ATTAAATACCAAGCA-AAGGAGGC--TAACGTATTCTCGATA---TTTGAGA-----AAA-TA-TCTTTGCCAGATAT-----GGTAACTGTTTTCTTCTTCTTCTTCT--TCTCTTTCATCTT--  
TTCCATTGAGAGAGATAGAAAAAAG-----TACGATGAT--GATA-----AAG-TTACCGGCGGTCTCTGATTTCGCTTGGTGCAGGTCGGGAACTGATTGGCTAACACCACCAC-  
GTGTCTTGTCATGGTTGGCTTGTGAGC-----TCCCGCCTTGCATCAACTGAATCTGAGTCCGAGGTGAAAAAATAT-----GGATCC-AAC---TTTCAGATC--TGACACATTCTTCGTC-ACTCTT----  
-----AAGGTAAATCTTGAT-----ATTTTGTTT---AT  
>Cir\_MIR168b  
ATTATATACCCATCG-AAGGAAGC--TAACGTATACTCGATA---TTCGATAGCGA-----GAAAAA--TCTTTGCCAGATAT-----AGCAACTGGTTTCTTCTTCTTCTCT---  
TTTGTTTTATCTTTTCCAAATGACGGAAAGAGAGAGA-GA-----GACGATGATGATGGTA-----AAG-  
TTACCGGCGGTCTCGGATTCGCTTGGTGCAGGTCGGGAACTGATTGACTGTCACCGCCAC-GTGTTTTCTCATGATTGGCTTGTGACCGGCGATCGGA--  
TCCCGCCTGCATCAACTGAATCGGAGGCCGAGGTGAAAAGAAAA-----GGATCC-AACTTTTTTCAGATCTGTGGCTCAATCTTCTTCTGACTCTT-----AAGGTAGAAGCTTGAA-----  
ATCTTGTTT--AAC  
>Dte\_MIR168b  
-----  
CTGATTGGCTGACACCGCTACTGTGGATTTTCACGGTTGGCTTGTGAGCAGGGATCGGA--TCCTGCCTTCCATCAACTGAATCCGAGCCCAGGTGAAAACAAGAAATACAAG-----GCTACC-AAC-  
CTTTTCAGATC--TGGC-----A-----TGAA-----ACCTTTTTT---TT  
>Ech\_MIR168b  
ATTAAATACCCAGCA-AAGGAGGCTAAAATAATTCTCGATACGTATTGATAAAAAGA-----TCTTTGCCGATAT-----GGTAACTGTTT-CTACTTCTT-----CTCTTACATCTT-  
TTTCCAATGAGAGACAGAGAGAGAGA-----TACGATGAT--GGTTA-----AAG-TTACCGGCGGTCTCAGATTTCGCTTGGTGCAGGTCGGGAACTGATTGGCTGACATCACCAC-  
GTGTTTTGTCATGGTTGGTTGTGAGT-----TCCTGCCTTGCATCAACTGAATCGGAGTCCGAGGTGAAAAA-----GAATCC-AAC---TTTCAGATC--TGACAT-----CCTCTT-----  
---ATGGTACAATCTTGAA-----ATTTTTTTT---AT  
>Mma\_MIR168b  
AT-----AAAGAG-----TAACATATTCTCGATA---TTTGATAAAGACTAA-AAATCAGAGAAAA-TA-TCTTTGCCGATAT-----GGTAACTGTTT-CTCGTCCTT-----TCTTTTCATCTG-----  
GAGATACGATGA-----TG-GATGAT--TGTTA-----AAG-TTACCGGCGGTCTCAGATTTCGCTTGGTGCAGGTCGGGAACTGATTGGCTGATACCACCAC-  
GTGTCTTGAATGGTTGTCTTGTGAGT-----TCCAGCTTGCATCAAGTGAATCAGAGTCCGAGGTGAAAAGAA-----GTATGA-TAC---TTTCAGATC--TGACAC-----AATCTT-----  
-ATGGTACAATCTTGAA-----ATTTTATTT---AC  
>Ptu\_MIR168b  
ATAAAATACCCAGCA-AATTAGGTTAA-----CG-TA-----TCC---TCAGAGAGAAAAAATCTTTGCCAGATAT-----GGCAACTGTTT-CTTCTCTTCTTTTTTAATCTTTTTTTCTCTC-  
GATGAGAGAGAAGAAAGATGAGAGA-----TACGATGAT--GATA-----AAG-TTACCGGCGGTCTCTGATTTCGCTTGGTGCAGGTCGGGAACTGATTGGCTGACACCGCCAC-  
GTGTCTTATCATGGTTGGCTTGTGAGCAGTGCATCGGA--TCCCGCCTTGCATCAACTGAATCGGAGCCCAGGTGAAAAGAAGAAGAAACCTAAAAA--GGATCT-AAC---TTTCAGATC--  
TGACTCAATCTTTGTTCTCTT-----AAGGTATAATCTTGAATCAATCTTG--TTTATGTT-----  
>Rau-1\_MIR168b  
ATTAAATACCAAGCA-AAGAAGGC-----TA---TTTGATAAAGTCT-AAATCAGAGAAAA-TA-TCTTTACCAGATAT-----GGTAACTGTTTTCTCATCTTCT-----TCTTACATCTT--  
TTTCAATAAGAGAGAGAAAAAAG-----TACGATGAT--GATA-----AAG-TTACCGGCGGTCTCTGATTTCGCTTGGTGCAGGTCGGGAACTGATTGGCTGACGCCGACAC-  
ATGTGTTGTTATGGTTGGCTTGTGAGC-----TCCCGCCTTGCATCAACTGAATCGGAGCCCAGGTGAAAAAATTT-----GGATCC-AAC---TTTCAGATC--TGAGTCACTTCTTCTC-ACGCTT----  
-----AAGGTATAATCTTGAT-----ATTTTGTTT---AT  
>Tsa\_MIR168b  
GTTAAA-ACCCATCA-AAGGAGGC--TAATTAATTCTCGATA---TTTGATAG-----AGAGATAAAAA-TCTTTGCCAGATAT-----GGCAGCTGTTT-CTCGTTCCTG-----TTCTCTTATCTT-  
TTTGCAATGAGAGAGAGATAGAGGAA-----TACGATGATGATGATA-----AAG-TTACCGGCGGTCTCGGATTTCGCTTGGTGCAGGTCGGGAACTGATTGGCTGACACCGCCAC-

GTGGCTTGCCATGTTTGGCTTGTGAGCAGGGATCGGA--TCCCGCCTTGCATCAACTGAATCGGAGCTCGAGGTGAAAAGAAAGAAAGGAAA-----GGATCT-AAC---TTTCAGATC--TGACAC-----  
AATCTT-----GTTTAAGTTTTT-----TTTGTTGAAA
