# Supplementary material for: Evolution of MIR168 paralogs in Brassicaceae
Source: PubMed Central journal article supplement (PMC2664809; doi:10.1186/1471-2148-9-62), 2009-03-23
Supplement: 1471-2148-9-62-S3.pdf [file 1471-2148-9-62-S3.pdf]

## MICROSYNTENIC PHYLOGENETIC FOOTPRINTING OF *MIR168* LOCI IN BRASSICACEAE

Silvia Gazzani, Mingai Li, Silvia Maistri, Eliana Scarponi, Michele Graziola, Enrico Barbaro, Jörg Wunder, Antonella Furini, Heinz Saedler and Claudio Varotto

### Additional File 3

A) Primers used to isolate the *MIR168a* and *MIR168b* intergenic regions from Brassicaceae species. “Upstream” and “downstream” refer to transcription direction.

| Gene             | Primer           | Description                                                | Sequence 5' to 3'          |
|------------------|------------------|------------------------------------------------------------|----------------------------|
| <i>MIR168a/b</i> | K313             | from mature miR168 towards upstream sequences              | AATTAGTTCCCGACCTGCACCAAGC  |
|                  | K353             | from mature miR168 towards downstream sequences            | GCTTGGTGCAGGTCGGGA ACTAATT |
| <i>MIR168a</i>   | K315             | from upstream gene towards mature miR                      | CCAAAGACCAACATCACAGTTCCTA  |
|                  | K355             | from downstream gene towards miR                           | TTGGTTCAGGTTCTCAAGCTATGG   |
|                  | MaLoopStar_Cons1 | from miR168a* towards upstream sequences                   | CGATTCAGTTGATGGAAGGCGGGA   |
|                  | g014             | from miR168a upstream IR <sup>(a)</sup> towards mature miR | GTACAGATCACGCTCACATGG      |
| <i>MIR168b</i>   | K320             | from upstream gene towards mature miR                      | GCTCTCTTCACAGTGGTTGGTATCTC |
|                  | 5453-6s          | from upstream gene towards mature miR                      | CGAGTCTTTAACACCGCTGGCTC    |
|                  | K359             | miR168b from downstream gene towards miR                   | CACTTCTCCTTCTTCACATATCGTCA |
|                  | MbLoopStar_Cons1 | from miR168b* towards upstream sequences                   | CGATTCAGTTGATACAAGGCGGGA   |

<sup>(a)</sup> IR= intergenic region

B) Primers used for *MIR168a* and *MIR168b* expression studies.

| <b>Gene</b>    | <b>Primer</b> | <b>Description</b>                                    | <b>Sequence 5' to 3'</b>        |
|----------------|---------------|-------------------------------------------------------|---------------------------------|
| <i>MIR168a</i> | Mac-P1_For    | Forward primer for <i>pMIR168a::GFP-GUS</i> construct | CACCATGCTTGTGATGGTTCGATTC       |
|                | Mac-P1_Rev    | Reverse primer for <i>pMIR168a::GFP-GUS</i> construct | AGCCCGATGGTGAGACTCTACTA         |
| <i>MIR168b</i> | Mbc-P1_For    | Forward primer for <i>pMIR168b::GFP-GUS</i> construct | CACCTCTCTTCACAGTGGTTGGTATCTC    |
|                | Mbc-P1_Rev    | Reverse primer for <i>pMIR168b::GFP-GUS</i> construct | GGTACCGAGACCGCCGGTAACTTTAACAATC |
|                | Mb_RACE_1Rev  | <i>MIR168b</i> RACE primer                            | CGAGACCGCAGGTAACCTTTAAC         |
|                | Mb_RACE_2Rev  | <i>MIR168b</i> RACE nested primer                     | CTTTAACAATCATCGCATCTCTC         |

C) Primers used for phylogenetic reconstruction.

| <b>Gene</b>  | <b>Primer</b> | <b>Description</b>              | <b>Sequence 5' to 3'</b>      |
|--------------|---------------|---------------------------------|-------------------------------|
| <i>ITS</i>   | ITS-5_For     | Forward primer for <i>ITS</i>   | GGAAGTAAAAGTCGTAACAAGG        |
|              | ITS-2_Rev     | Reverse primer for <i>ITS</i>   | GATATGCTTAAACTCAGCGGG         |
| <i>EIF3E</i> | EIF3E_For     | Forward primer for <i>EIF3E</i> | TTTGAATGTGGCAACTAYTCTRGTGCTGC |
|              | EIF3E_Rev     | Reverse primer for <i>EIF3E</i> | ACCTCTTCACACTCYTTCATCTT       |
